# Supplementary material
Source: PubMed Central journal article supplement (PMC10199002)
Supplement: 41746_2023_830_MOESM1_ESM.pdf [file 41746_2023_830_MOESM1_ESM.pdf]

# Ontologizing Health Systems Data at Scale: Making Translational Discovery a Reality

## SUPPLEMENTARY MATERIAL

Tiffany J. Callahan, Adrienne L. Stefanski, Jordan M. Wyrwa, Chenjie Zeng, Anna Ostropolets, Juan M. Banda, William A. Baumgartner Jr., Richard D. Boyce, Elena Casiraghi, Ben D. Coleman, Janine H. Collins, Sara J. Deakyne Davies, James A. Feinstein, Asiyah Y. Lin, Blake Martin, Nicolas A. Matentzoglou, Daniella Meeker, Justin Reese, Jessica Sinclair, Sanya B. Taneja, Katy E. Trinkley, Nicole A. Vasilevsky, Andrew E. Williams, Xingmin A. Zhang, Joshua C. Denny, Patrick B. Ryan, George Hripcsak, Tellen D. Bennett, Melissa A. Haendel, Peter N. Robinson, Lawrence E. Hunter, Michael G. Kahn

### Table of Contents

|                                                                                                                                                    |    |
|----------------------------------------------------------------------------------------------------------------------------------------------------|----|
| Supplementary Table 1: Paper Acronyms and Concept Definitions.                                                                                     | 1  |
| Supplementary Table 2: OMOP2OBO Mapping Algorithm Resources.                                                                                       | 2  |
| Supplementary Table 3: Clinical Data Used to Develop and Validate the OMOP2OBO Mappings.                                                           | 4  |
| Supplementary Figure 1: Available Mapping Metadata by OBO Foundry Ontology.                                                                        | 5  |
| Supplementary Table 4: OMOP2OBO Mapping Categories.                                                                                                | 6  |
| Supplementary Table 5: OMOP2OBO Condition Concept Mapping Results.                                                                                 | 8  |
| Supplementary Table 6: OMOP2OBO Drug Ingredient Concept Mapping Results.                                                                           | 9  |
| Supplementary Table 7: OMOP2OBO Measurement Concept Mapping Results.                                                                               | 10 |
| Supplementary Figure 2: Concept Similarity Scores by OMOP Domain and OBO Foundry Ontology.                                                         | 11 |
| Supplementary Figure 3: Overview of the OMOP2OBO Condition Concepts in the OHDSI Concept Prevalence Data by Coverage Status.                       | 12 |
| Supplementary Figure 4: Frequency of OMOP2OBO Condition Concepts in the OHDSI Concept Prevalence Data by OBO Foundry Ontology and Data Wave.       | 13 |
| Supplementary Figure 5: Overview of the OMOP2OBO Drug Ingredient Concepts in the OHDSI Concept Prevalence Data by Coverage Status.                 | 14 |
| Supplementary Figure 6: Frequency of OMOP2OBO Drug Ingredient Concepts in the OHDSI Concept Prevalence Data by OBO Foundry Ontology and Data Wave. | 15 |
| Supplementary Figure 7: Overview of the OMOP2OBO Measurement Concepts in the OHDSI Concept Prevalence Data by Coverage Status.                     | 16 |
| Supplementary Figure 8: Frequency of OMOP2OBO Measurement Concepts in the OHDSI Concept Prevalence Data by OBO Foundry Ontology and Data Wave.     | 17 |
| Supplementary Figure 9: Standardized Phenotype Risk Scores (PheRS) by Disease for Cases and Controls.                                              | 18 |
| Supplementary Table 8: Descriptive Statistics by Disease for Cases and Controls.                                                                   | 19 |

**Supplementary Table 1: Paper Acronyms and Concept Definitions.**

| Term            | Definition                                                        |
|-----------------|-------------------------------------------------------------------|
| <i>Acronyms</i> |                                                                   |
| ACMG            | American College of Medical Genetics and Genomics                 |
| AoU             | All of Us Research Program                                        |
| BoW             | Bag-of-words                                                      |
| CDM             | Common Data Model                                                 |
| CHCO            | Children's Hospital of Colorado                                   |
| ChEBI           | Chemical Entities of Biological Interest                          |
| CL              | Cell Ontology                                                     |
| CUI             | Concept Unique Identifier                                         |
| EHR             | Electronic Health Record                                          |
| eMERGE          | Electronic Medical Records and Genomics                           |
| FBN1            | Fibrillin 1                                                       |
| HPO             | Human Phenotype Ontology                                          |
| ICD             | International Classification of Diseases                          |
| LOINC           | Logical Observation Identifiers, Names and Codes                  |
| MEN1            | Menin 1                                                           |
| Mondo           | Mondo Disease Ontology                                            |
| NCBITaxon       | National Center for Biotechnology Information Organismal Taxonomy |
| NF2             | Moesin-Ezrin-Radixin Like (MERLIN) Tumor                          |
| OHDSI           | Observational Health Data Sciences and Informatics                |
| OBO             | Open Biological and Biomedical Ontology                           |
| OMIM            | Online Mendelian Inheritance in Man                               |
| OMOP            | Observational Medical Outcomes Partnership                        |
| PEDSnet         | National Pediatric Learning Health System                         |
| PheRS           | Phenotype Risk Score                                              |
| PRO             | Protein Ontology                                                  |
| RET             | Ret Proto-Oncogene                                                |
| SDHAF2          | Succinate Dehydrogenase Complex Assembly Factor 2                 |
| SDHB            | Succinate Dehydrogenase Complex Subunit B                         |
| SDHC            | Succinate Dehydrogenase Complex Subunit C                         |
| SNOMED-CT       | Systematized Nomenclature of Medicine -- Clinical Terms           |
| TF-IDF          | Term frequency-inverse document frequency                         |
| TGFBR1          | Transforming Growth Factor Beta Receptor 1                        |
| TSC1            | Tuberous Sclerosis Complex Subunit 1                              |
| TSC2            | Tuberous Sclerosis Complex Subunit 2                              |
| Uberon          | Uber-Anatomy Ontology                                             |
| UMLS            | Unified Medical Language System                                   |
| VO              | Vaccine Ontology                                                  |

| Term                                                   | Definition                                                                      |
|--------------------------------------------------------|---------------------------------------------------------------------------------|
| <i>Concepts</i>                                        |                                                                                 |
| Concepts Used in Clinical Practice                     | Data Wave 1; All standard OMOP concepts used at least once in clinical practice |
| Concepts Not Used in Clinical Practice                 | Data Wave 2; All standard OMOP concepts not used in clinical practice           |
| OMOP Standard Condition Occurrence Vocabulary          | SnomedCT Release 20180131                                                       |
| OMOP Standard Drug Exposure Ingredient Vocabulary      | RxNorm Full 20180507                                                            |
| OMOP Standard Measurement Vocabulary                   | LOINC 2.64                                                                      |
| OBO Foundry Ontologies mapped to OMOP Conditions       | HPO, Mondo                                                                      |
| OBO Foundry Ontologies mapped to OMOP Drug Ingredients | ChEBI, NCBITaxon, PRO, VO                                                       |
| OBO Foundry Ontologies mapped to OMOP Measurements     | ChEBI, CL, HPO, NCBITaxon, PRO, Uberon                                          |

**Supplementary Table 2: OMOP2OBO Mapping Algorithm Resources.**

| Resource                              | URL                                                                                                                                                                                                              |
|---------------------------------------|------------------------------------------------------------------------------------------------------------------------------------------------------------------------------------------------------------------|
| <i>OMOP2OBO Resources</i>             |                                                                                                                                                                                                                  |
| PyPI Package                          | <a href="https://pypi.org/project/omop2obo">https://pypi.org/project/omop2obo</a>                                                                                                                                |
| GitHub Repository                     | <a href="https://github.com/callahantiff/OMOP2OBO">https://github.com/callahantiff/OMOP2OBO</a>                                                                                                                  |
| Project Wiki                          | <a href="https://github.com/callahantiff/OMOP2OBO/wiki">https://github.com/callahantiff/OMOP2OBO/wiki</a>                                                                                                        |
| Mapping Dashboard                     | <a href="http://tiffanycallahan.com/OMOP2OBO_Dashboard">http://tiffanycallahan.com/OMOP2OBO_Dashboard</a>                                                                                                        |
| Zenodo Community                      | <a href="https://zenodo.org/communities/omop2obo">https://zenodo.org/communities/omop2obo</a>                                                                                                                    |
| Condition Occurrence Mappings         | <a href="https://doi.org/10.5281/zenodo.6774363">https://doi.org/10.5281/zenodo.6774363</a>                                                                                                                      |
| Drug Exposure Ingredient Mappings     | <a href="https://doi.org/10.5281/zenodo.6774401">https://doi.org/10.5281/zenodo.6774401</a>                                                                                                                      |
| Measurement Mappings                  | <a href="https://doi.org/10.5281/zenodo.6774443">https://doi.org/10.5281/zenodo.6774443</a>                                                                                                                      |
| Accuracy Evaluation                   | <a href="https://github.com/callahantiff/OMOP2OBO/wiki/Accuracy">https://github.com/callahantiff/OMOP2OBO/wiki/Accuracy</a>                                                                                      |
| Generalizability Evaluation           | <a href="https://github.com/callahantiff/OMOP2OBO/wiki/Generalizability">https://github.com/callahantiff/OMOP2OBO/wiki/Generalizability</a>                                                                      |
| <i>Mapping Resources</i>              |                                                                                                                                                                                                                  |
| OMOP CDM V5.3                         | <a href="https://ohdsi.github.io/CommonDataModel/cdm53.html">https://ohdsi.github.io/CommonDataModel/cdm53.html</a>                                                                                              |
| OHDSI Athena                          | <a href="https://athena.ohdsi.org">https://athena.ohdsi.org</a>                                                                                                                                                  |
| UMLS 2020AA Release Date              | <a href="https://www.nlm.nih.gov/research/umls/licensedcontent/umlsarchives04.html#2020AA">https://www.nlm.nih.gov/research/umls/licensedcontent/umlsarchives04.html#2020AA</a>                                  |
| LOINC2HPO Annotations                 | <a href="https://github.com/monarch-initiative/loinc2hpo/annotations.tsv">https://github.com/monarch-initiative/loinc2hpo/annotations.tsv</a>                                                                    |
| OHDSI Concept Prevalence Study        | <a href="https://github.com/OHDSI/StudyProtocolSandbox/tree/master/ConceptPrevalence">https://github.com/OHDSI/StudyProtocolSandbox/tree/master/ConceptPrevalence</a>                                            |
| <i>OBO Foundry Ontologies</i>         |                                                                                                                                                                                                                  |
| ChEBI                                 | <a href="http://purl.obolibrary.org/obo/chebi.owl">http://purl.obolibrary.org/obo/chebi.owl</a>                                                                                                                  |
| CL                                    | <a href="http://purl.obolibrary.org/obo/cl.owl">http://purl.obolibrary.org/obo/cl.owl</a>                                                                                                                        |
| HPO                                   | <a href="http://purl.obolibrary.org/obo/hp.owl">http://purl.obolibrary.org/obo/hp.owl</a>                                                                                                                        |
| Mondo                                 | <a href="http://purl.obolibrary.org/obo/mondo.owl">http://purl.obolibrary.org/obo/mondo.owl</a>                                                                                                                  |
| NCBITaxon                             | <a href="http://purl.obolibrary.org/obo/ncbitaxon.owl">http://purl.obolibrary.org/obo/ncbitaxon.owl</a>                                                                                                          |
| PRO                                   | <a href="http://purl.obolibrary.org/obo/pr.owl">http://purl.obolibrary.org/obo/pr.owl</a>                                                                                                                        |
| Uberon                                | <a href="http://purl.obolibrary.org/obo/uberont.owl">http://purl.obolibrary.org/obo/uberont.owl</a>                                                                                                              |
| VO                                    | <a href="http://purl.obolibrary.org/obo/vo.owl">http://purl.obolibrary.org/obo/vo.owl</a>                                                                                                                        |
| <i>Project and Analysis Notebooks</i> |                                                                                                                                                                                                                  |
| <sup>a</sup> OMOP2OBO                 | <sup>b</sup> <a href="https://github.com/callahantiff/OMOP2OBO/blob/master/omop2obo_notebook.ipynb">OMOP2OBO/blob/master/omop2obo_notebook.ipynb</a>                                                             |
| Mapping Analysis                      | <sup>b</sup> <a href="https://github.com/callahantiff/OMOP2OBO/blob/master/resources/analyses/omop2obo_manuscript_analyses.ipynb">OMOP2OBO/blob/master/resources/analyses/omop2obo_manuscript_analyses.ipynb</a> |
| Mapping Evaluation                    | <sup>b</sup> <a href="https://github.com/callahantiff/OMOP2OBO/blob/master/resources/analyses/omop2obo_mapping_validation.ipynb">OMOP2OBO/blob/master/resources/analyses/omop2obo_mapping_validation.ipynb</a>   |

<sup>a</sup>This Jupyter Notebook serves the same purpose as main.py but provides users with a more interactive interface to use when running the algorithm.

<sup>b</sup>Primary OMOP2OBO Github: <https://github.com/callahantiff/OMOP2OBO>.

Acronyms: ChEBI (Chemical Entities of Biological Interest); CL (Cell Ontology); HPO (Human Phenotype Ontology); Mondo (Mondo Disease Ontology); NCBITaxon (National Center for Biotechnology Information Taxon Ontology); OBO (Open Biological and Biomedical Ontology); OMOP (Observational Medical Outcomes Partnership); PRO (Protein Ontology); Uberon (Uber-Anatomy Ontology); VO (Vaccine Ontology).

**Supplementary Table 3: Clinical Data Used to Develop and Validate the OMOP2OBO Mappings.**

| Data Source                   | Description                                                                                                                                                                                                                                                                                                                                                                                                                                                                                                                                                                                                                                                                                                                                                                                                                                                                                                                                                                                                                                                                                                                                                                                                                                                                                                                                                                                                                                                                                                                                                                                                                                                                                                                                                                                                                                                                                                                                                                                                                                                        | Use                                           |
|-------------------------------|--------------------------------------------------------------------------------------------------------------------------------------------------------------------------------------------------------------------------------------------------------------------------------------------------------------------------------------------------------------------------------------------------------------------------------------------------------------------------------------------------------------------------------------------------------------------------------------------------------------------------------------------------------------------------------------------------------------------------------------------------------------------------------------------------------------------------------------------------------------------------------------------------------------------------------------------------------------------------------------------------------------------------------------------------------------------------------------------------------------------------------------------------------------------------------------------------------------------------------------------------------------------------------------------------------------------------------------------------------------------------------------------------------------------------------------------------------------------------------------------------------------------------------------------------------------------------------------------------------------------------------------------------------------------------------------------------------------------------------------------------------------------------------------------------------------------------------------------------------------------------------------------------------------------------------------------------------------------------------------------------------------------------------------------------------------------|-----------------------------------------------|
| CHCO OMOP Database            | <p>The CHCO pediatric OMOP database is a de-identified data repository that allows for the utilization of clinical pediatric information captured in electronic medical records. The database was created in October 2018, contains over 6 million patients, and is stored within University of Colorado Anschutz Medical Campus' Health Data Compass HIPAA Google Cloud-based infrastructure. The data conform to the structure defined by PEDSnet OMOP CDM v3.0, which is an adaptation of the OMOP CDM version 5.0. Use of these data was approved by the Colorado Multiple Institutional Review Board (#15-0445).</p> <p>See GitHub<sup>a</sup> for more information: <a href="https://github.com/HealthDataCompass/CHCODEID">https://github.com/HealthDataCompass/CHCODEID</a></p>                                                                                                                                                                                                                                                                                                                                                                                                                                                                                                                                                                                                                                                                                                                                                                                                                                                                                                                                                                                                                                                                                                                                                                                                                                                                            | Mapping Development                           |
| OHDSI Concept Prevalence Data | <p>The Concept Prevalence Study was conducted in order to examine patterns of OMOP standard concept use across several study sites within the OHDSI network. The data set includes OMOP standard concepts, OMOP domain, and record-level frequencies for each standard concept by study site. All study sites that contained data for standard OMOP condition, drug exposure ingredient, and measurement concepts were eligible for use in the current work (n=22 sites). These data were supplemented to include data from two additional academic medical centers. The 24 Study sites are listed below.</p> <p><u>Study Sites:</u> (1) Ajou University Database; (2) IQVIA US Ambulatory Electronic Medical Record; (3) IQVIA Longitudinal Patient Data Australia; (4) IQVIA Disease Analyzer France; (5) IQVIA Disease Analyzer Germany; (6) The Healthcare Cost and Utilization Project Nationwide Inpatient Sample; (7) IQVIA US Hospital Charge Data Master; (8) IBM MarketScan Commercial Database; (9) IBM MarketScan Multi-State Medicaid Database; (10) IBM MarketScan Medicare Supplemental Database; (11) Japan Medical Data Center database; (12) Medical Information Mart for Intensive Care III; (13) Korea National Health Insurance Service/National Sample Cohort; (14) Optum De-Identified Clinformatics Data-Mart-Database—Date of Death; (15) Optum De-Identified Clinformatics Data-Mart-Database—Socio-Economic Status; (16) Optum De-identified Electronic Health Record Dataset; (17) IQVIA US LRxDx Open Claims; (18) Premier Healthcare Database; (19) University of Southern California PScanner; (20) Stanford Medicine Research Data Repository; (21) Tufts Medical Center Database; (22) University of Colorado Anschutz Medical Campus Health Group; (23) Australian Electronic Practice-based Research Network; (24) Columbia University Medical Center Database.</p> <p>See GitHub for more information: <a href="https://github.com/ohdsi-studies/ConceptPrevalence">https://github.com/ohdsi-studies/ConceptPrevalence</a></p> | Mapping Validation<br><i>Generalization</i>   |
| AoU Data                      | <p>The National Institutes of Health's All of Us Research Program is an initiative tasked with gathering data from at least one million United States citizens with the goal of creating a diverse health resource to support biomedical research and precision medicine. The All of Us Research Hub contains data from over 630 sites on more than 528,000 participants. Data include electronic health records, biological and genetics samples, physical measurements and wearable data, and survey data. The All of Us Research Program would not be possible without the partnership of its participants. The current work utilized data from the version 6 build.</p> <p>See the All of Us Research Hub for more information: <a href="https://www.researchallofus.org">https://www.researchallofus.org</a></p>                                                                                                                                                                                                                                                                                                                                                                                                                                                                                                                                                                                                                                                                                                                                                                                                                                                                                                                                                                                                                                                                                                                                                                                                                                              | Mapping Validation<br><i>Clinical Utility</i> |

<sup>a</sup>This is a private repository, please contact the authors for access and to obtain additional information.

Acronyms: AoU (AllOfUs); CDM (common data model); CHCO (Children's Hospital Colorado); HIPAA (Health Insurance Portability and Accountability Act); OHDSI (Observational Health Data Sciences and Informatics); OMOP (Observational Medical Outcomes Partnership); PEDSnet (National Pediatric Learning Health System).

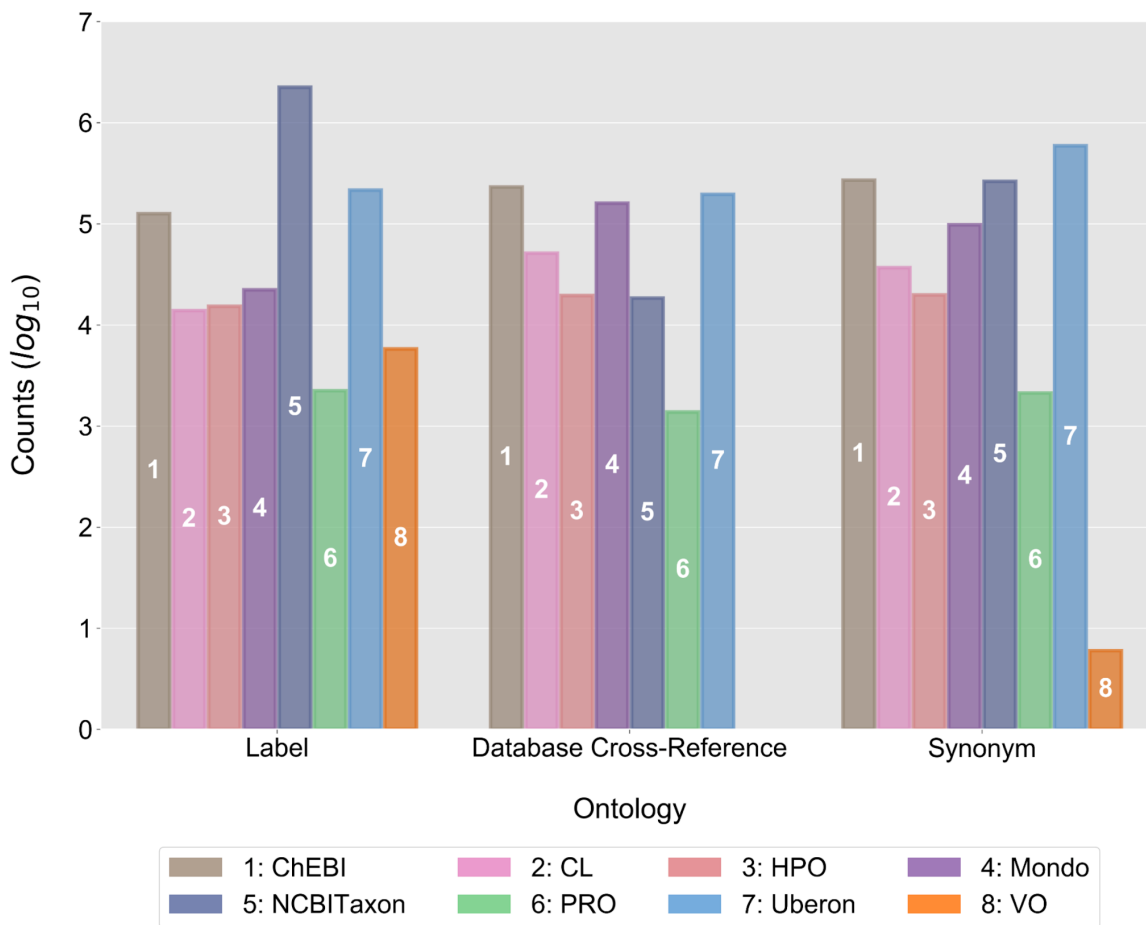

**Supplementary Figure 1: Available Mapping Metadata by OBO Foundry Ontology.**

This figure provides a visual illustration of the counts, in log 10 scale, of labels, database cross-references, and synonyms available for mapping by Open Biological and Biomedical Ontology (OBO) Foundry ontology. The labels on the bars are numbers which correspond to the ontologies: (1) ChEBI (Chemical Entities of Biological Interest); (2) CL (Cell Ontology); (3) HPO (Human Phenotype Ontology); (4) Mondo (Mondo Disease Ontology); (5) NCBITaxon (National Center for Biotechnology Information Taxon Ontology); (6) PRO (Protein Ontology); (7) Uberon (Uber-Anatomy Ontology); and (8) VO (Vaccine Ontology).

**Supplementary Table 4: OMOP2OBO Mapping Categories.**

| Mapping Category               | Definition                                                                                                                                                                                                                                                                                                                                                                                                                                                                                                                                                                                                                                                                                                                                                                                                                                                                                                                      |
|--------------------------------|---------------------------------------------------------------------------------------------------------------------------------------------------------------------------------------------------------------------------------------------------------------------------------------------------------------------------------------------------------------------------------------------------------------------------------------------------------------------------------------------------------------------------------------------------------------------------------------------------------------------------------------------------------------------------------------------------------------------------------------------------------------------------------------------------------------------------------------------------------------------------------------------------------------------------------|
| Automatic One-to-One Concept   | <p><b>Definition:</b> A one-to-one mapping that is automatically generated at the concept-level through exact string mappings to labels/synonyms or exact mappings between codes.</p> <p><b>Example:</b></p> <ul style="list-style-type: none"> <li>- OMOP : 22945 (Horizontal overbite)</li> <li>- HP : 0011095 (Overjet)</li> </ul> <p>This mapping was created through an exact string mapping on “overjet”, which is the HP concept label and an OMOP concept synonym. This mapping is also supported through exact mappings between database cross-references to SNOMED-CT 70305005 and UMLS C0596028.</p>                                                                                                                                                                                                                                                                                                                 |
| Automatic One-to-One Ancestor  | <p><b>Definition:</b> A one-to-one mapping that is automatically generated for a concept’s ancestor through exact string mappings to labels/synonyms or exact mappings between codes.</p> <p><b>Example:</b></p> <ul style="list-style-type: none"> <li>- OMOP : 22722 (Accessory salivary gland)</li> <li>- HP : 0010286 (abnormal salivary gland morphology)</li> </ul> <p>This mapping was created through exact mappings to one of the OMOP concept’s ancestors on the database cross-references to SNOMED-CT 10890000 and UMLS C0036093.</p>                                                                                                                                                                                                                                                                                                                                                                               |
| Automatic One-to-Many Concept  | <p><b>Definition:</b> A one-to-many mapping that is automatically generated at the concept-level through exact string mappings to labels/synonyms or exact mappings between codes. For release 1.0, one-to-many mappings indicate that one OMOP concept was mapped to one or more OBO Foundry ontology concepts.</p> <p><b>Example:</b></p> <ul style="list-style-type: none"> <li>- OMOP : 78854 (Osteopoikilosis)</li> <li>- MONDO : 0001414 (Osteopoikilosis) AND MONDO : 0008157 (Duschke-Ollendorff Syndrome)</li> </ul> <p>This mapping was created through 2 exact string mappings on “osteopoikilosis”, which is a Mondo concept exact synonym and an OMOP concept label and synonym and “duschke-ollendorff syndrome”, which is a Mondo concept exact synonym and label and an OMOP concept synonym. This mapping is also supported through exact mappings between database cross-references to SNOMED-CT 9147009.</p> |
| Automatic One-to-Many Ancestor | <p><b>Definition:</b> A one-to-many mapping that is automatically generated for a concept’s ancestor through exact string mappings to labels or synonyms or exact mappings between codes. For release 1.0, one-to-many mappings indicate that one OMOP concept was mapped to one or more OBO Foundry ontology concepts.</p> <p><b>Example:</b></p> <ul style="list-style-type: none"> <li>- OMOP : 74185 (Open fracture of cuboid bone of foot)</li> <li>- MONDO : 0005315 (bone fracture) AND MONDO : 0044989 (foot disease)</li> </ul> <p>This mapping was created through 3 exact string mappings on “fracture”, “fracture of bone”, and “disorder of foot”, which are all Mondo exact synonyms and labels of the OMOP concept’s ancestors. This mapping is also supported by exact mappings to one or more of the OMOP concept’s ancestors on the database cross-references to SNOMED-CT 125605004 and 118932009.</p>       |
| Manual One-to-One Concept      | <p><b>Definition:</b> A one-to-one mapping that is manually generated at the concept-level and usually requires the use of external resources.</p> <p><b>Example:</b></p> <ul style="list-style-type: none"> <li>- OMOP : 4070954 (Mesiodens)</li> <li>- MONDO : 0008533 (Teeth, supernumeracy)</li> </ul> <p>This mapping was manually created through external evidence from a PubMed article, which stated “Mesiodens is a supernumerary tooth present in the midline between the two central incisors” (PMID : 21998774).</p>                                                                                                                                                                                                                                                                                                                                                                                               |
| Manual One-to-Many Concept     | <p><b>Definition:</b> A one-to-many mapping that is manually generated at the concept-level and usually requires the use of external resources. For release 1.0, one-to-many mappings indicate that one OMOP concept was mapped to one or more OBO Foundry ontology concepts.</p> <p><b>Example:</b></p> <ul style="list-style-type: none"> <li>- OMOP : 439140 (Neonatal polycythemia)</li> <li>- HP : 0003623 (Neonatal onset) AND HP : 0001901 (Polycythemia)</li> </ul> <p>This mapping was created through an exact string mappings on “erythrocytosis”, which is a HP concept exact synonym and a OMOP concept ancestor label. This mapping is also supported through exact mappings between database cross-references to SNOMED-CT 127062003 and UMLS C1527405 and C0032461.</p>                                                                                                                                         |

| Mapping Category                     | Definition                                                                                                                                                                                                                                                                                                                                                                                                                                                                                                                                                                                                                                                                                                                                                                              |
|--------------------------------------|-----------------------------------------------------------------------------------------------------------------------------------------------------------------------------------------------------------------------------------------------------------------------------------------------------------------------------------------------------------------------------------------------------------------------------------------------------------------------------------------------------------------------------------------------------------------------------------------------------------------------------------------------------------------------------------------------------------------------------------------------------------------------------------------|
| Cosine Similarity One-to-One Concept | <p><b>Definition:</b> A one-to-one mapping that is automatically generated at the concept-level using cosine similarity scores. For release 1.0, the cosine similarity scores were applied to concept embeddings learned from a Bag-of-Words model with TF-IDF, which was applied to all available labels and synonyms at the concept- and ancestor-level.</p> <p><b>Example:</b></p> <ul style="list-style-type: none"> <li>- OMOP:4147326 (Sore throat symptom)</li> <li>- HP:0033050 (Throat pain)</li> </ul> <p>This mapping received a cosine similarity score of 0.66.</p>                                                                                                                                                                                                        |
| Unmapped                             | <p>This concept is used when no suitable mapping is possible, for concepts which have not yet been mapped, and for concepts which are purposefully not mapped.</p> <p><b>Examples:</b></p> <p><i>No Suitable Mondo Mapping</i></p> <ul style="list-style-type: none"> <li>- OMOP:4235440 (Genetic alleles)</li> </ul> <p><i>Not Yet Mapped to HP or Mondo</i></p> <ul style="list-style-type: none"> <li>- OMOP:4174055 (Athetoid paralysis)</li> </ul> <p><i>Purposefully Not Mapped to HP or Mondo</i></p> <ul style="list-style-type: none"> <li>- OMOP:432499 (Mechanical complication due to coronary bypass graft) → <i>Complication</i></li> <li>- OMOP:432498 (Burn of axilla) → <i>Injury</i></li> <li>- OMOP:4056963 (Patient on self-medication) → <i>Finding</i></li> </ul> |

Acronyms: HP (Human Phenotype Ontology); Mondo (Mondo Disease Ontology); OMOP (Observational Medical Outcomes Partnership); PMID (PubMed Identifier); SNOMED-CT (Systematized Nomenclature of Medicine -- Clinical Terms); UMLS (Unified Medical Language System).



**Supplementary Table 5: OMOP2OBO Condition Concept Mapping Results.**

|                                      | HPO           |                | Mondo          |                |
|--------------------------------------|---------------|----------------|----------------|----------------|
| Concepts Used in Practice            | Yes           | No             | Yes            | No             |
| <i>Mapping Category</i>              |               |                |                |                |
| Automatic One-to-One Concept         | 3,601         | 1,166          | 4,836          | 4,261          |
| Automatic One-to-One Ancestor        | 3,154         | 10,440         | 5,962          | 2,949          |
| Automatic One-to-Many Concept        | 125           | 25             | 632            | 253            |
| Automatic One-to-Many Ancestor       | 1,138         | 36,947         | 4,482          | 35,742         |
| Cosine Similarity One-to-One Concept | 994           | 380            | 553            | 114            |
| Manual One-to-One Concept            | 5,119         | 0              | 755            | 0              |
| Manual One-to-Many Concept           | 10,328        | 0              | 2,835          | 0              |
| <b>Total Mapped Concepts</b>         | <b>24,459</b> | <b>48,958</b>  | <b>20,055</b>  | <b>43,319</b>  |
| <i>Mapping Evidence</i>              |               |                |                |                |
| Database Cross-References            | 38,473        | 279,236        | 52,430         | 339,195        |
| Synonyms                             | 10,169        | 42,191         | 67,381         | 85,130         |
| Labels                               | 19,343        | 97,920         | 75,795         | 113,562        |
| Cosine Similarity                    | 11,955        | 15,825         | 12,789         | 114            |
| Biocuration                          | 15,447        | 0              | 3,590          | 0              |
| <b>Total Mapping Evidence</b>        | <b>95,387</b> | <b>435,172</b> | <b>211,985</b> | <b>538,001</b> |
| <i>Unmapped</i>                      |               |                |                |                |
| <sup>a</sup> None                    | 50            | 20,771         | 84             | 5,118          |
| Injury                               | 3,323         | 10,733         | 3,323          | 10,733         |
| Carrier Status                       | 23            | 0              | 22             | 0              |
| Complication                         | 906           | 128            | 906            | 128            |
| Finding                              | 368           | 0              | 4,739          | 21,292         |
| <b>Total Unmapped Concepts</b>       | <b>4,670</b>  | <b>31,632</b>  | <b>9,074</b>   | <b>37,271</b>  |

The mapping category is constructed by combining the following elements: (1) the approach used to create it (i.e., “automatic”, “manual”, or “cosine similarity”), (2) cardinality (i.e., one-to-one or one-to-many), and (3) level (i.e., concept or ancestor).

<sup>a</sup>The unmapped “None” category for Concepts Not Used in Practice includes concepts that have not yet been mapped. For Concepts Used in Practice, “None” indicates concepts that were unable to be mapped to an Open Biological and Biomedical Ontology (OBO) Foundry ontology concept.

Acronyms: HPO (Human Phenotype); Mondo (Mondo Disease Ontology).

**Supplementary Table 6: OMOP2OBO Drug Ingredient Concept Mapping Results.**

| Concepts Used in Practice            | ChEBI         |               | PRO          |               | VO           |               | NCBITaxon    |              |
|--------------------------------------|---------------|---------------|--------------|---------------|--------------|---------------|--------------|--------------|
|                                      | Yes           | No            | Yes          | No            | Yes          | No            | Yes          | No           |
| <i>Mapping Category</i>              |               |               |              |               |              |               |              |              |
| Automatic One-to-One Concept         | 959           | 2,192         | 1            | 42            | 90           | 18            | 20           | 135          |
| Automatic One-to-One Ancestor        | 15            | 130           | 1            | 19            | 0            | 4             | 3            | 14           |
| Automatic One-to-Many Concept        | 235           | 169           | 0            | 1             | 0            | 0             | 0            | 1            |
| Automatic One-to-Many Ancestor       | 60            | 149           | 2            | 0             | 2            | 0             | 2            | 1            |
| Cosine Similarity One-to-One Concept | 31            | 78            | 8            | 10            | 3            | 14            | 136          | 4,105        |
| Manual One-to-One Concept            | 321           | 0             | 157          | 0             | 21           | 0             | 230          | 0            |
| Manual One-to-Many Concept           | 72            | 0             | 8            | 0             | 2            | 0             | 14           | 0            |
| <b>Total Mapped Concepts</b>         | <b>1,693</b>  | <b>2,718</b>  | <b>177</b>   | <b>72</b>     | <b>118</b>   | <b>36</b>     | <b>405</b>   | <b>4,256</b> |
| <i>Mapping Evidence</i>              |               |               |              |               |              |               |              |              |
| Database Cross-References            | 954           | 759           | 0            | 0             | 0            | 0             | 0            | 0            |
| Synonyms                             | 4,565         | 7,732         | 4            | 94            | 90           | 18            | 40           | 199          |
| Labels                               | 5,573         | 9,676         | 8            | 132           | 276          | 58            | 52           | 391          |
| Cosine Similarity                    | 1,350         | 2,562         | 9            | 54            | 96           | 32            | 160          | 4,241        |
| Biocuration                          | 393           | 0             | 165          | 0             | 23           | 0             | 244          | 0            |
| <b>Total Mapping Evidence</b>        | <b>12,835</b> | <b>20,729</b> | <b>186</b>   | <b>280</b>    | <b>485</b>   | <b>108</b>    | <b>496</b>   | <b>4,831</b> |
| <i>Unmapped</i>                      |               |               |              |               |              |               |              |              |
| <sup>a</sup> None                    | 0             | 7,392         | 1,516        | 10,038        | 1,575        | 10,074        | 1,288        | 5,854        |
| <b>Total Unmapped Concepts</b>       | <b>0</b>      | <b>7,392</b>  | <b>1,516</b> | <b>10,038</b> | <b>1,575</b> | <b>10,074</b> | <b>1,288</b> | <b>5,854</b> |

The mapping category is constructed by combining the following elements: (1) the approach used to create it (i.e., “automatic”, “manual”, or “cosine similarity”), (2) cardinality (i.e., one-to-one or one-to-many), and (3) level (i.e., concept or ancestor).

<sup>a</sup>The unmapped “None” category for Concepts Not Used in Practice includes concepts that have not yet been mapped. For Concepts Used in Practice, “None” indicates concepts that were unable to be mapped to an Open Biological and Biomedical Ontology (OBO) Foundry ontology concept.

Acronyms: ChEBI (Chemical Entities of Biological Interest); PRO (Protein Ontology); VO (Vaccine Ontology); NCBITaxon (National Center for Biotechnology Information Taxon Ontology).

**Supplementary Table 7: OMOP2OBO Measurement Concept Mapping Results.**

| Concepts Used in Practice            | HPO          |              | Uberon       |               | NCBITaxon    |              | PRO          |              | ChEBI        |               | CL           |              |
|--------------------------------------|--------------|--------------|--------------|---------------|--------------|--------------|--------------|--------------|--------------|---------------|--------------|--------------|
|                                      | Yes          | No           | Yes          | No            | Yes          | No           | Yes          | No           | Yes          | No            | Yes          | No           |
| <i>Mapping Category</i>              |              |              |              |               |              |              |              |              |              |               |              |              |
| Automatic One-to-One Concept         | 17           | 3            | 1,793        | 3,589         | 320          | 444          | 44           | 12           | 264          | 515           | 182          | 186          |
| Automatic One-to-One Ancestor        | 23           | 20           | 592          | 593           | 181          | 351          | 9            | 6            | 1,380        | 1,924         | 14           | 0            |
| Automatic One-to-Many Concept        | 0            | 0            | 10           | 0             | 0            | 0            | 0            | 0            | 0            | 0             | 46           | 24           |
| Automatic One-to-Many Ancestor       | 0            | 0            | 2            | 0             | 0            | 0            | 0            | 0            | 29           | 3             | 3            | 0            |
| Cosine Similarity One-to-One Concept | 108          | 5            | 50           | 92            | 44           | 106          | 103          | 29           | 102          | 374           | 82           | 20           |
| Manual One-to-One Concept            | 3,902        | 6,761        | 406          | 462           | 2,300        | 4,452        | 1,267        | 2,996        | 1,377        | 2,409         | 319          | 184          |
| Manual One-to-Many Concept           | 37           | 12           | 1,234        | 2,065         | 5            | 454          | 149          | 189          | 337          | 1,190         | 33           | 21           |
| <b>Total Mapped Concepts</b>         | <b>4,087</b> | <b>6,801</b> | <b>4,087</b> | <b>6,801</b>  | <b>2,850</b> | <b>5,807</b> | <b>1,572</b> | <b>3,232</b> | <b>3,489</b> | <b>6,415</b>  | <b>679</b>   | <b>435</b>   |
| <i>Mapping Evidence</i>              |              |              |              |               |              |              |              |              |              |               |              |              |
| Database Cross-References            | 7            | 0            | 6            | 26            | 0            | 0            | 0            | 0            | 409          | 935           | 261          | 145          |
| Synonyms                             | 12           | 4            | 5,232        | 8,308         | 465          | 1,627        | 73           | 24           | 2,832        | 6,166         | 486          | 414          |
| Labels                               | 28           | 24           | 1,637        | 1,242         | 307          | 458          | 29           | 14           | 3,045        | 5,712         | 296          | 227          |
| Cosine Similarity                    | 234          | 128          | 699          | 553           | 484          | 827          | 159          | 61           | 1,482        | 2,044         | 296          | 231          |
| Biocuration                          | 3,939        | 6,773        | 1,640        | 2,527         | 2,305        | 4,906        | 1,416        | 3,185        | 1,714        | 3,599         | 352          | 205          |
| <b>Total Mapping Evidence</b>        | <b>4,220</b> | <b>6,929</b> | <b>9,214</b> | <b>12,656</b> | <b>3,561</b> | <b>7,818</b> | <b>1,677</b> | <b>3,284</b> | <b>9,482</b> | <b>18,456</b> | <b>1,691</b> | <b>1,222</b> |
| <i>Unmapped</i>                      |              |              |              |               |              |              |              |              |              |               |              |              |
| <sup>a</sup> None                    | 13           | 0            | 13           | 0             | 1,250        | 994          | 2,528        | 3,569        | 611          | 386           | 3,421        | 6,366        |
| Not Mapped Test Type                 | 108          | 3            | 108          | 3             | 108          | 3            | 108          | 3            | 108          | 3             | 108          | 3            |
| Unspecified Sample                   | 217          | 40           | 217          | 40            | 217          | 40           | 217          | 40           | 217          | 40            | 217          | 40           |
| <b>Total Unmapped Concepts</b>       | <b>338</b>   | <b>43</b>    | <b>338</b>   | <b>43</b>     | <b>1,575</b> | <b>1,037</b> | <b>2,853</b> | <b>3,612</b> | <b>936</b>   | <b>429</b>    | <b>3,746</b> | <b>6,409</b> |

The mapping category is constructed by combining the following elements: (1) the approach used to create it (i.e., “automatic”, “manual”, or “cosine similarity”), (2) cardinality (i.e., one-to-one or one-to-many), and (3) level (i.e., concept or ancestor).

<sup>a</sup>The unmapped “None” category for Concepts Not Used in Practice includes concepts that have not yet been mapped. For Concepts Used in Practice, “None” indicates concepts that were unable to be mapped to an Open Biological and Biomedical Ontology (OBO) Foundry ontology concept.

Acronyms: HPO (Human Phenotype Ontology); Uberon (Uber-Anatomy Ontology); NCBITaxon (National Center for Biotechnology Information Taxon Ontology); PRO (Protein Ontology); ChEBI (Chemical Entities of Biological Interest); CL (Cell Ontology).

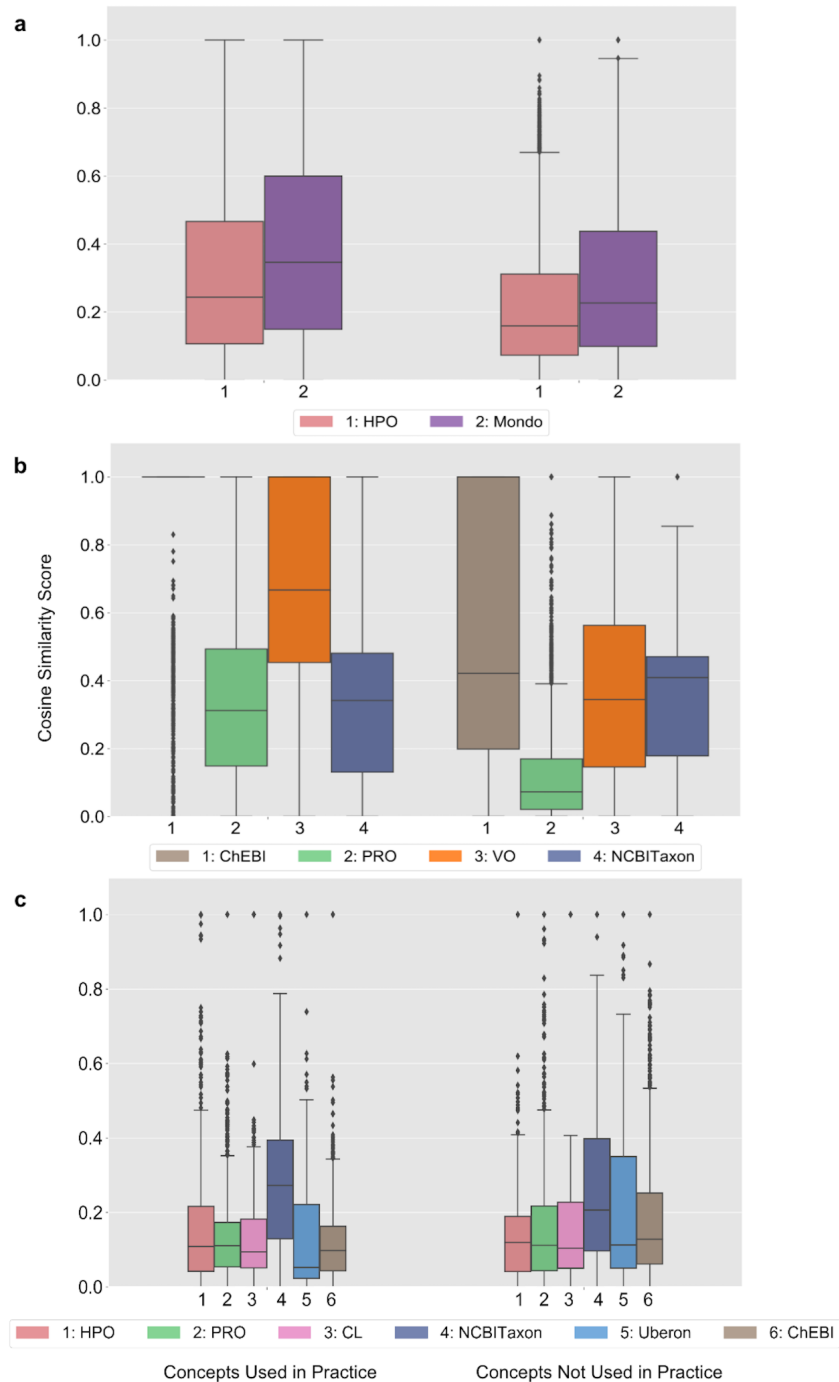

## Supplementary Figure 2: Concept Similarity Scores by OMOP Domain and OBO Foundry Ontology.

The figure presents the distribution of cosine similarity scores by Open Biological and Biomedical Ontology (OBO) Foundry ontology and data wave (Concepts Used in Practice [all concepts associated with at least one patient and/or visit in the Children's Hospital of Colorado OMOP Database] and Concepts Not Used in Practice [all concepts not used in clinical practice]) for three Observational Medical Outcomes Partnership (OMOP) domains: **(A)** Conditions, **(B)** Drugs, and **(C)** Measurements. In each boxplot, the box extends from the first to third quartile of the data with a center line used to indicate the median. Whiskers extend from each box by 1.5x the interquartile range and outliers that extend past the whiskers shown as dots. The x-axis labels are numbers which correspond to the ontologies within each domain from top to bottom: Conditions (1: HPO, 2: Mondo); Drug Ingredients (1: ChEBI, 2: PRO, 3: VO, 4: NCBITaxon); and Measurements (1: HPO, 2: PRO, 3: CL, 4: NCBITaxon, 5: Uberon, 6: ChEBI).

Acronyms: HPO (Human Phenotype Ontology); Mondo (Monarch Disease Ontology); ChEBI (Chemical Entities of Biological Interest); PRO (Protein Ontology); VO (Vaccine Ontology); NCBITaxon (National Center for Biotechnology Information Taxon Ontology); CL (Cell Ontology); Uberon (Uber-Anatomy Ontology).

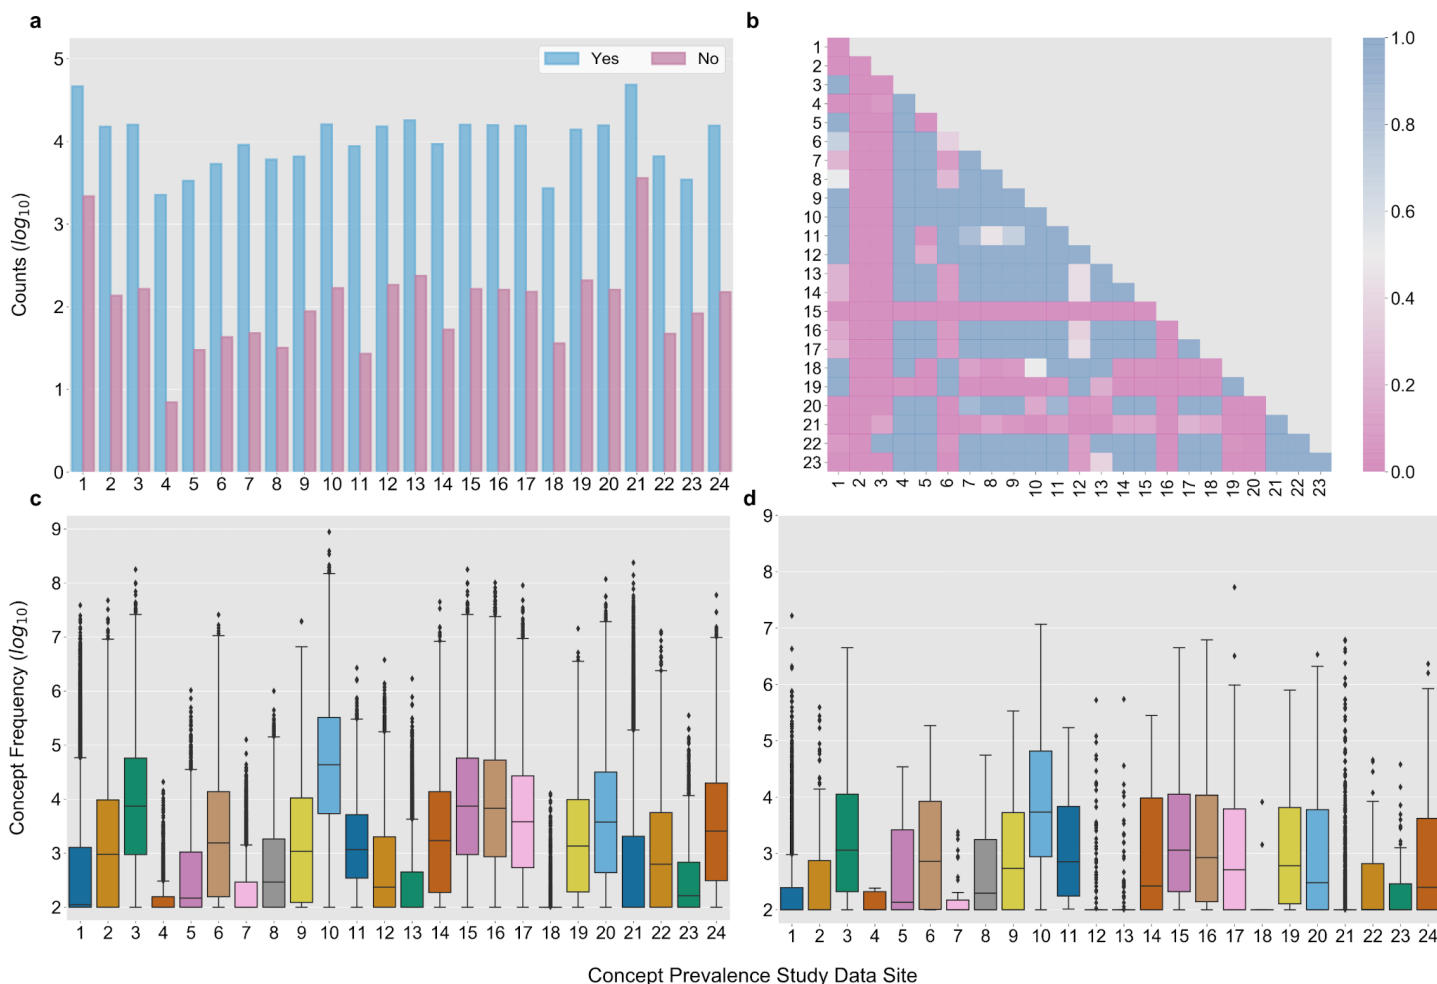

**Supplementary Figure 3: Overview of the OMOP2OBO Condition Concepts in the OHDSI Concept Prevalence Data by Coverage Status.**

(A) This figure presents the counts of OMOP (Observational Medical Outcomes Partnership) condition concepts (log 10 scale) in the Concept Prevalence Study data by site (1-24) and OMOP2OBO mapping set coverage status (“Yes”/“No”). (B) This figure visualizes the results of conducting a chi-square test of independence with Yate's correction to assess differences in the proportions of OMOP condition concepts covered by the OMOP2OBO mapping set across the Concept Prevalence Study data sites. The figure presents a heatmap to visualize Bonferroni adjusted p-values for post-hoc tests which confirmed that 32% of the pairwise site comparisons had significantly different coverage of the OMOP2OBO mapping sets ( $p < 0.001$  for all significant comparisons). (C) This figure presents the frequency distributions of OMOP condition concepts covered by the OMOP2OBO mapping set (log 10 scale) in the Concept Prevalence Study data by site. (D) This figure presents the frequency distributions of OMOP condition concepts not covered by the OMOP2OBO mapping set (log 10 scale) in the Concept Prevalence Study data by site. Figures C-D: in each boxplot, the box extends from the first to third quartile of the data with a center line used to indicate the median. Whiskers extend from each box by 1.5x the interquartile range and outliers that extend past the whiskers shown as dots. The x-axis labels are numbers which correspond to the Concept Prevalence Study site index: (1) Ajou University Database; (2) IQVIA US Ambulatory Electronic Medical Record; (3) IQVIA Longitudinal Patient Data Australia; (4) IQVIA Disease Analyzer France; (5) IQVIA Disease Analyzer Germany; (6) The Healthcare Cost and Utilization Project Nationwide Inpatient Sample; (7) IQVIA US Hospital Charge Data Master; (8) IBM MarketScan Commercial Database; (9) IBM MarketScan Multi-State Medicaid Database; (10) IBM MarketScan Medicare Supplemental Database; (11) Japan Medical Data Center database; (12) Medical Information Mart for Intensive Care III; (13) Korea National Health Insurance Service/National Sample Cohort; (14) Optum De-Identified Clinformatics Data-Mart-Database—Date of Death; (15) Optum De-Identified Clinformatics Data-Mart-Database—Socio-Economic Status; (16) Optum De-identified Electronic Health Record Dataset; (17) IQVIA US LRxDx Open Claims; (18) Premier Healthcare Database; (19) University of Southern California PScanner; (20) Stanford Medicine Research Data Repository; (21) Tufts Medical Center Database; (22) University of Colorado Anschutz Medical Campus Health Group; (23) Australian Electronic Practice-based Research Network; (24) Columbia University Medical Center Database.

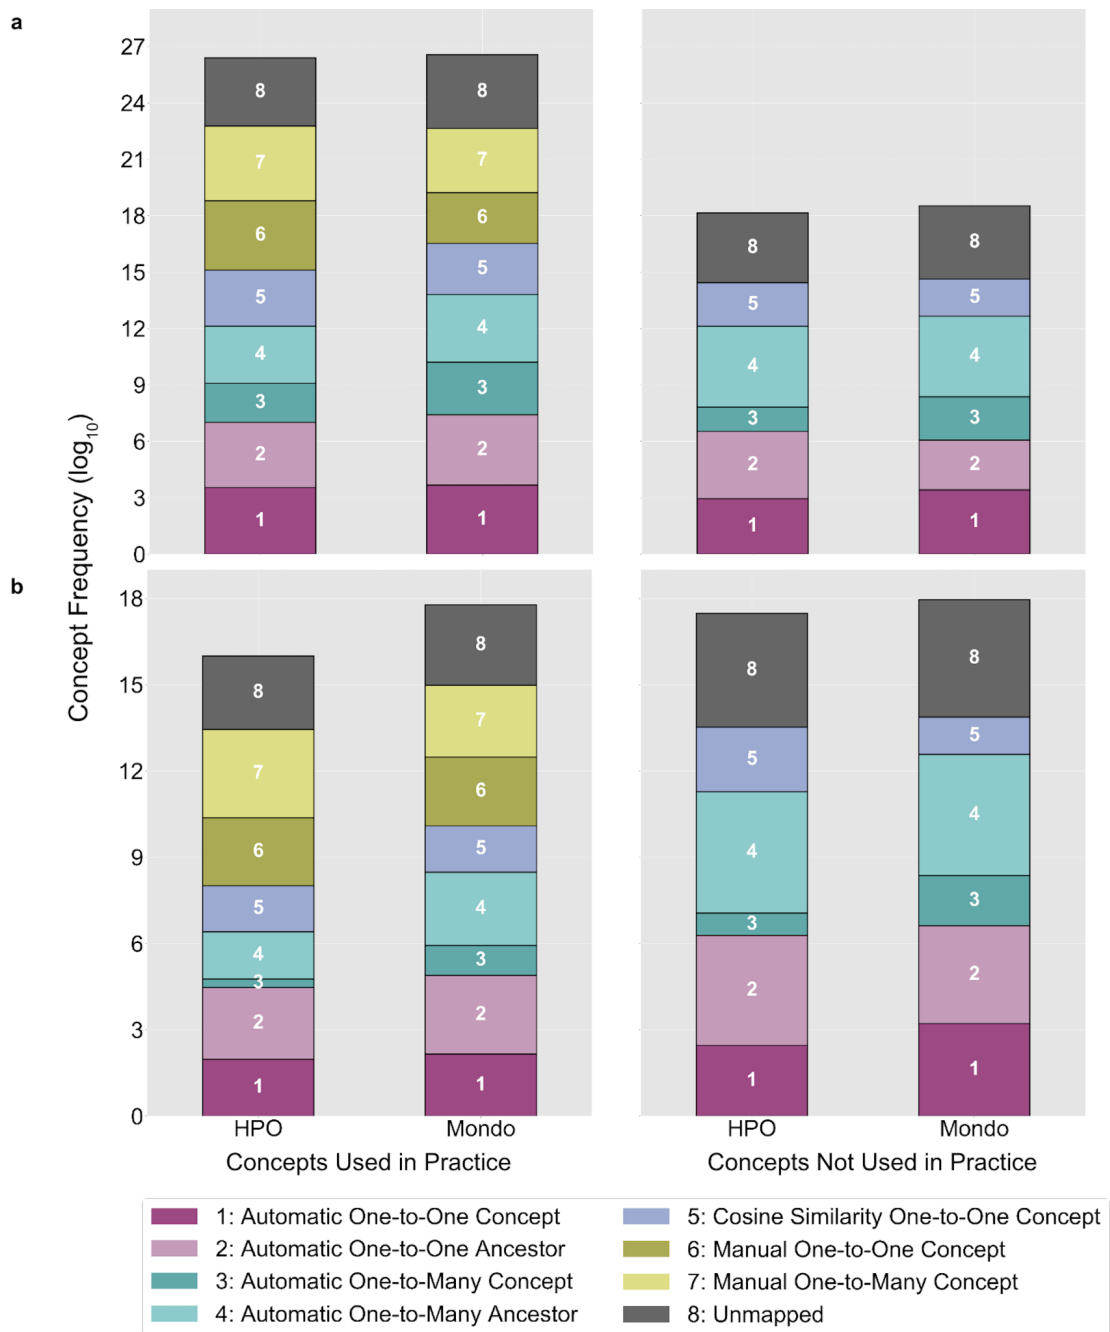

#### Supplementary Figure 4: Frequency of OMOP2OBO Condition Concepts in the OHDSI Concept Prevalence Data by OBO Foundry Ontology and Data Wave.

(A) This figure visualizes the count of Observational Medical Outcomes Partnership (OMOP) condition concepts (log 10 scale) in the OMOP2OBO mapping set that overlapped with Concept Prevalence Study by Open Biological and Biomedical Ontology (OBO) Foundry ontology and (Concepts Used in Practice [all concepts associated with at least one patient and/or visit in the Children’s Hospital of Colorado OMOP Database] and Concepts Not Used in Practice [all concepts not used in clinical practice]). (B) This figure visualizes the count of OMOP condition concepts (log 10 scale) in the OMOP2OBO mapping set condition concepts that were not present in the Concept Prevalence Study data by OBO Foundry ontology and data wave. The labels on the bars are numbers which correspond to the OMOP2OBO mapping categories: (1) Automatic One-to-One Concept; (2) Automatic One-to-One Ancestor (3) Automatic One-to-Many Concept; (4) Automatic One-to-Many Ancestor; (5) Cosine Similarity One-to-One Concept; (6) Manual One-to-One Concept; (7) Manual One-to-Many Concept; and (8) Unmapped.

Acronyms: HPO (Human Phenotype Ontology); Mondo (Monarch Disease Ontology).

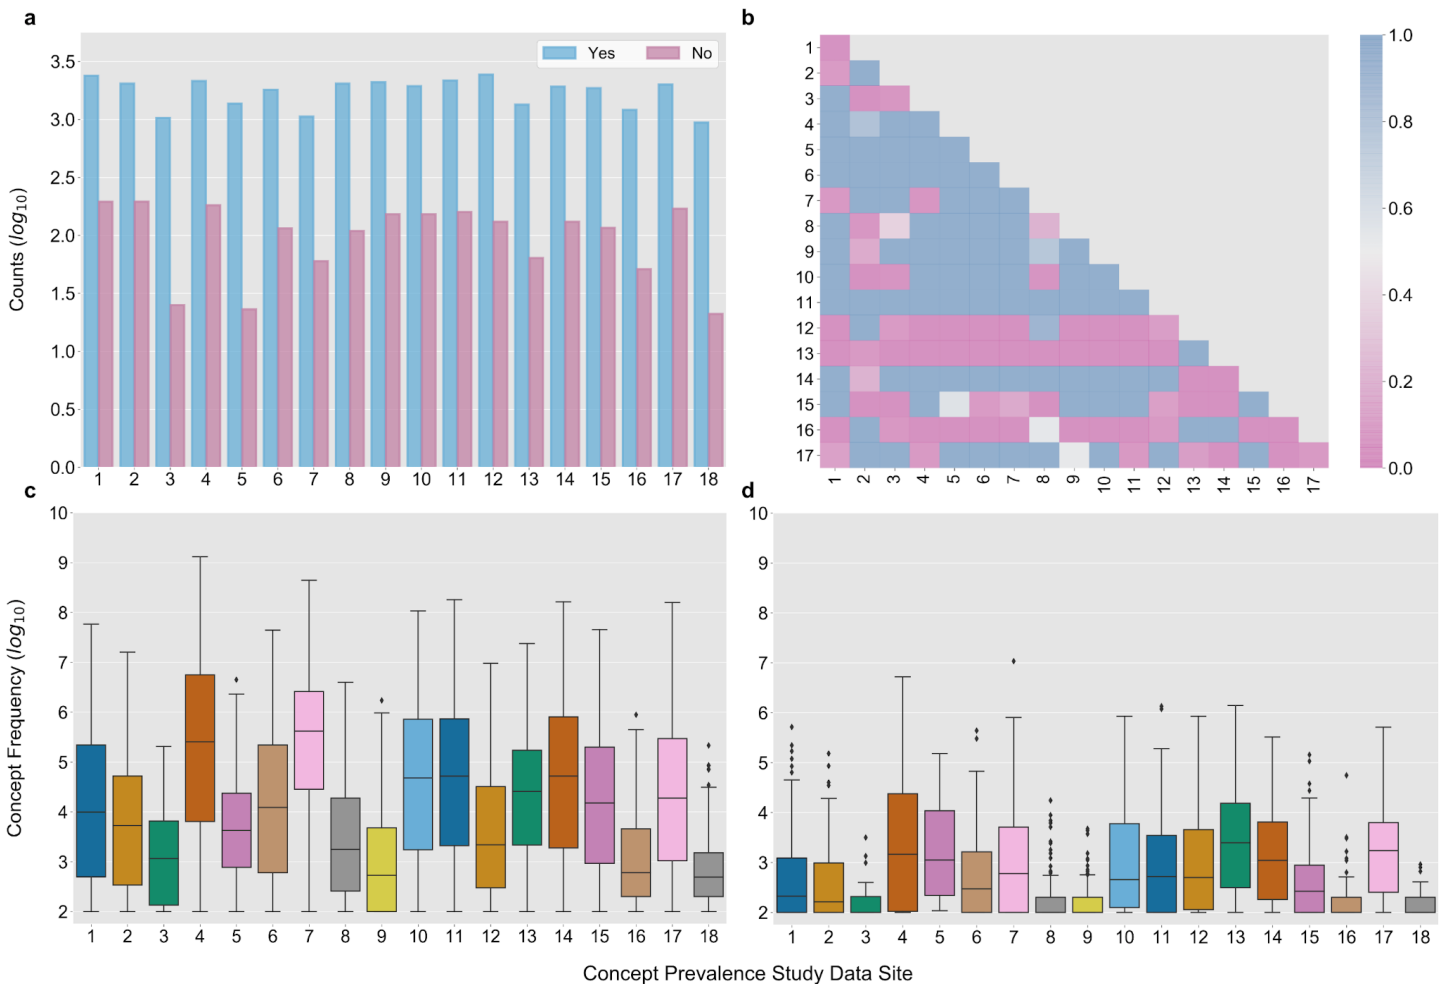

### Supplementary Figure 5: Overview of the OMOP2OBO Drug Ingredient Concepts in the OHDSI Concept Prevalence Data by Coverage Status.

(A) This figure presents the counts of OMOP (Observational Medical Outcomes Partnership) drug ingredient concepts ( $\log_{10}$  scale) in the Concept Prevalence Study data by site (1-18) and OMOP2OBO mapping set coverage status ("Yes"/"No"). (B) This figure visualizes the results of conducting a chi-square test of independence with Yate's correction to assess differences in the proportions of OMOP drug ingredient concepts covered by the OMOP2OBO mapping set across the Concept Prevalence Study data sites. The figure presents a heatmap to visualize Bonferroni adjusted p-values for post-hoc tests which confirmed that 22% of the pairwise site comparisons had significantly different coverage of the OMOP2OBO mapping sets ( $p < 0.001$  for all significant comparisons). (C) This figure presents the frequency distributions of OMOP drug ingredient concepts covered by the OMOP2OBO mapping set ( $\log_{10}$  scale) in the Concept Prevalence Study data by site. (D) This figure presents the frequency distributions of OMOP drug ingredient concepts not covered by the OMOP2OBO mapping set ( $\log_{10}$  scale) in the Concept Prevalence Study data by site. Figures C-D: in each boxplot, the box extends from the first to third quartile of the data with a center line used to indicate the median. Whiskers extend from each box by 1.5x the interquartile range and outliers that extend past the whiskers shown as dots. The x-axis labels are numbers which correspond to the Concept Prevalence Study site index: (1) IQVIA US Ambulatory Electronic Medical Record; (2) IQVIA Longitudinal Patient Data Australia; (3) IQVIA Disease Analyzer Germany; (4) IQVIA US Hospital Charge Data Master; (5) IBM MarketScan Commercial Database; (6) IBM MarketScan Multi-State Medicaid Database; (7) IBM MarketScan Medicare Supplemental Database; (8) Japan Medical Data Center database; (9) Optum De-Identified Clinformatics Data-Mart-Database—Socio-Economic Status; (10) Optum De-identified Electronic Health Record Dataset; (11) Optum De-identified Electronic Health Record Dataset; (12) Premier Healthcare Database; (13) University of Southern California PScanner; (14) Stanford Medicine Research Data Repository; (15) Tufts Medical Center Database; (16) University of Colorado Anschutz Medical Campus Health Group; (17) Australian Electronic Practice-based Research Network; (18) Columbia University Medical Center Database.

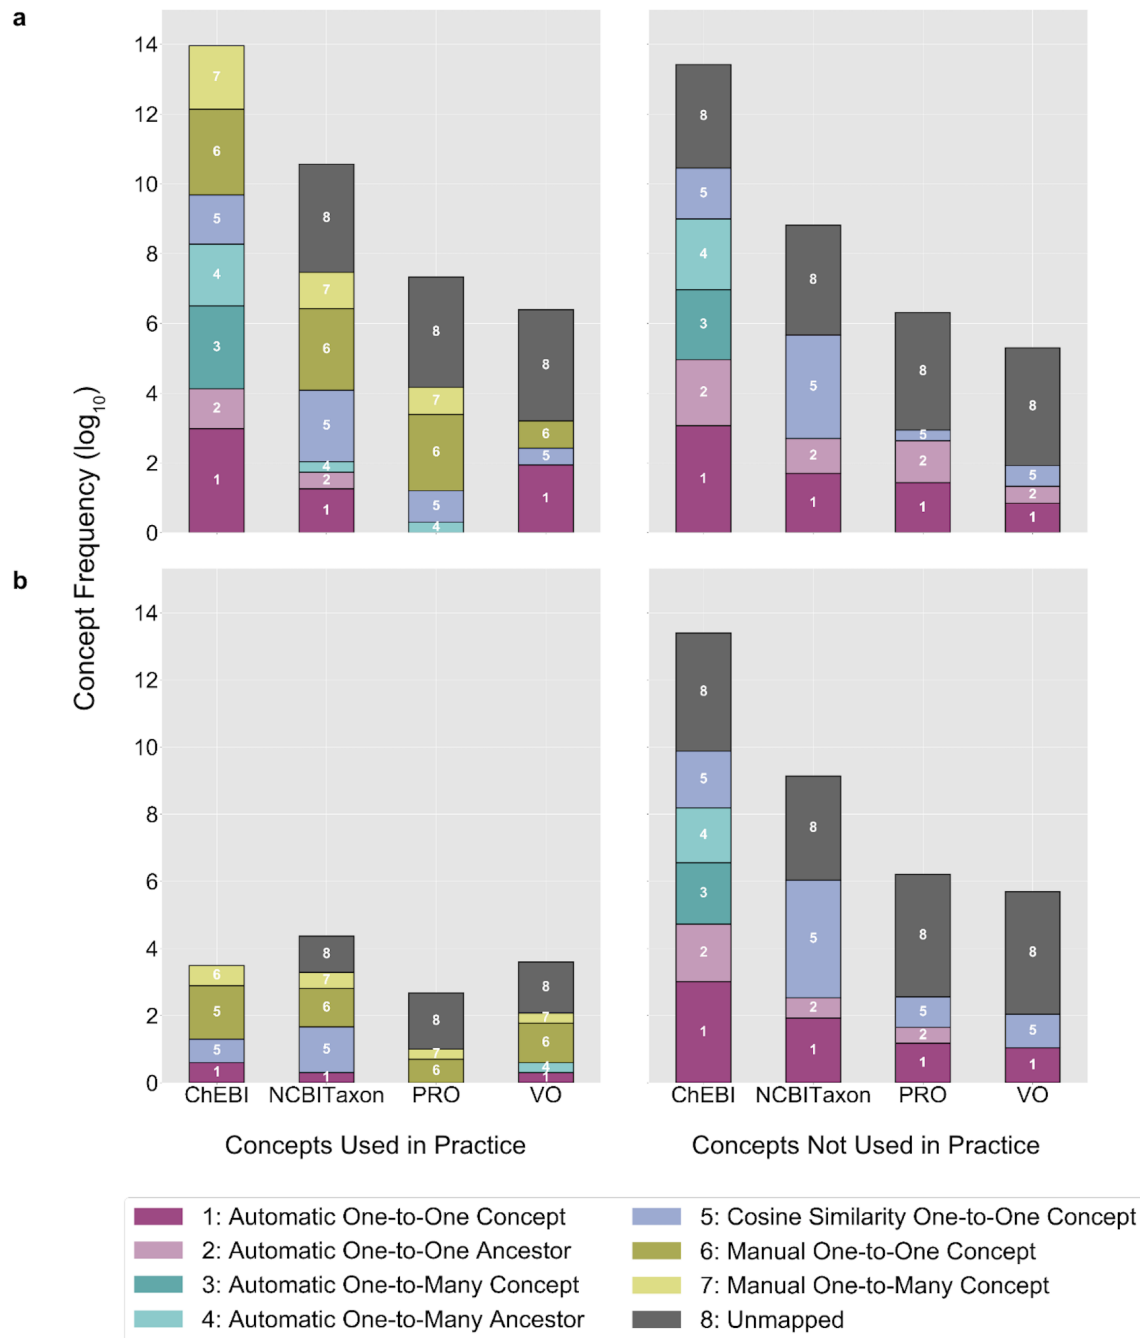

**Supplementary Figure 6: Frequency of OMOP2OBO Drug Ingredient Concepts in the OHDSI Concept Prevalence Data by OBO Foundry Ontology and Data Wave.**

(A) This figure visualizes the count of Observational Medical Outcomes Partnership (OMOP) drug ingredient concepts (log 10 scale) in the OMOP2OBO mapping set that overlapped with concepts in the Concept Prevalence Study by Open Biological and Biomedical Ontology (OBO) Foundry ontology and data wave (Concepts Used in Practice [all concepts associated with at least one patient and/or visit in the Children’s Hospital of Colorado OMOP Database] and Concepts Not Used in Practice [all standard OMOP concepts not used in clinical practice]). (B) This figure visualizes the count of OMOP drug ingredient concepts (log 10 scale) in the OMOP2OBO mapping set that were not present in the Concept Prevalence Study data by OBO Foundry ontology and data wave. The labels on the bars are numbers which correspond to the OMOP2OBO mapping categories: (1) Automatic One-to-One Concept; (2) Automatic One-to-One Ancestor (3) Automatic One-to-Many Concept; (4) Automatic One-to-Many Ancestor; (5) Cosine Similarity One-to-One Concept; (6) Manual One-to-One Concept; (7) Manual One-to-Many Concept; and (8) Unmapped.

Acronyms: ChEBI (Chemical Entities of Biological Interest); NCBITaxon (National Center for Biotechnology Information Taxon Ontology); PRO (Protein Ontology); VO (Vaccine Ontology).



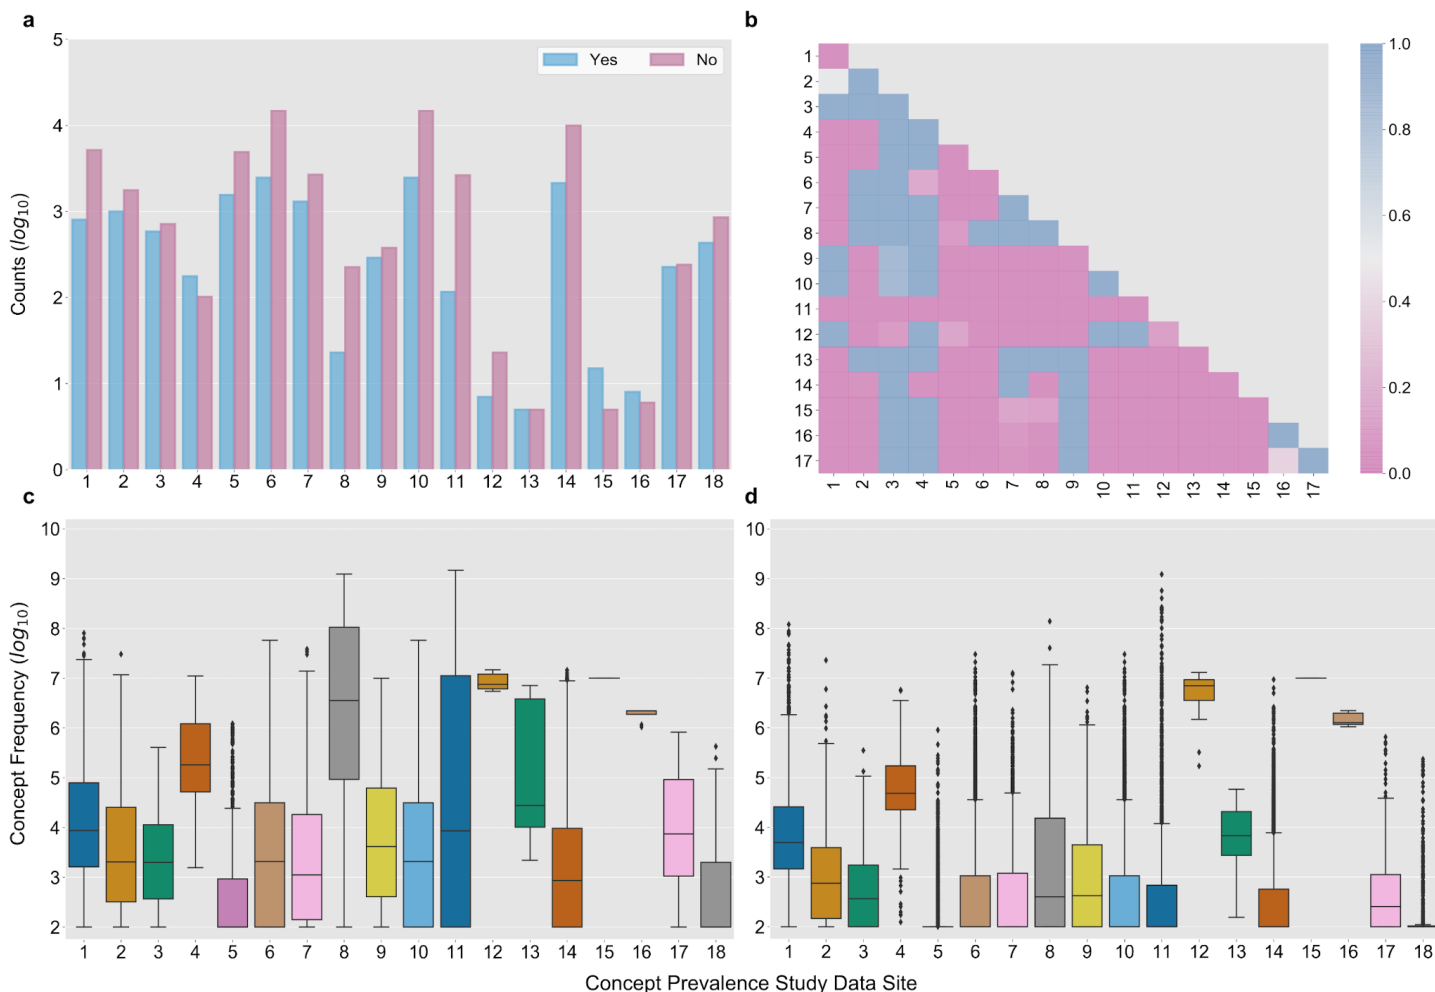

**Supplementary Figure 7: Overview of the OMOP2OBO Measurement Concepts in the OHDSI Concept Prevalence Data by Coverage Status.**

(A) This figure presents the counts of OMOP (Observational Medical Outcomes Partnership) measurement concepts (log 10 scale) in the Concept Prevalence Study data by site (1-18) and OMOP2OBO mapping set coverage status (“Yes”/“No”). (B) This figure visualizes the results of conducting a chi-square test of independence with Yate's correction to assess differences in the proportions of OMOP measurement concepts covered by the OMOP2OBO mapping set across the Concept Prevalence Study data sites. The figure presents a heatmap to visualize Bonferroni adjusted p-values for post-hoc tests which confirmed that 56% of the pairwise site comparisons had significantly different coverage of the OMOP2OBO mapping sets ( $p < 0.001$  for all significant comparisons). (C) This figure presents the frequency distributions of OMOP measurement concepts covered by the OMOP2OBO mapping set (log 10 scale) in the Concept Prevalence Study data by site. (D) This figure presents the frequency distributions of OMOP measurement concepts not covered by the OMOP2OBO mapping set (log 10 scale) in the Concept Prevalence Study data by site. Figures C-D: in each boxplot, the box extends from the first to third quartile of the data with a center line used to indicate the median. Whiskers extend from each box by 1.5x the interquartile range and outliers that extend past the whiskers shown as dots. The x-axis labels are numbers which correspond to the Concept Prevalence Study site index: (1) IQVIA US Ambulatory Electronic Medical Record; (2) IQVIA Longitudinal Patient Data Australia; (3) IQVIA Disease Analyzer France; (4) IQVIA Disease Analyzer Germany; (5) IBM MarketScan Commercial Database; (6) IBM MarketScan Medicare Supplemental Database; (7) Japan Medical Data Center database; (8) Medical Information Mart for Intensive Care III; (9) Korea National Health Insurance Service/National Sample Cohort; (10) Optum De-Identified Clinformatics Data-Mart-Database—Date of Death; (11) Optum De-Identified Clinformatics Data-Mart-Database—Socio-Economic Status; (12) Optum De-identified Electronic Health Record Dataset; (13) Premier Healthcare Database; (14) University of Southern California PScanner; (15) Stanford Medicine Research Data Repository; (16) University of Colorado Anschutz Medical Campus Health Group; (17) Australian Electronic Practice-based Research Network; (18) Columbia University Medical Center Database.

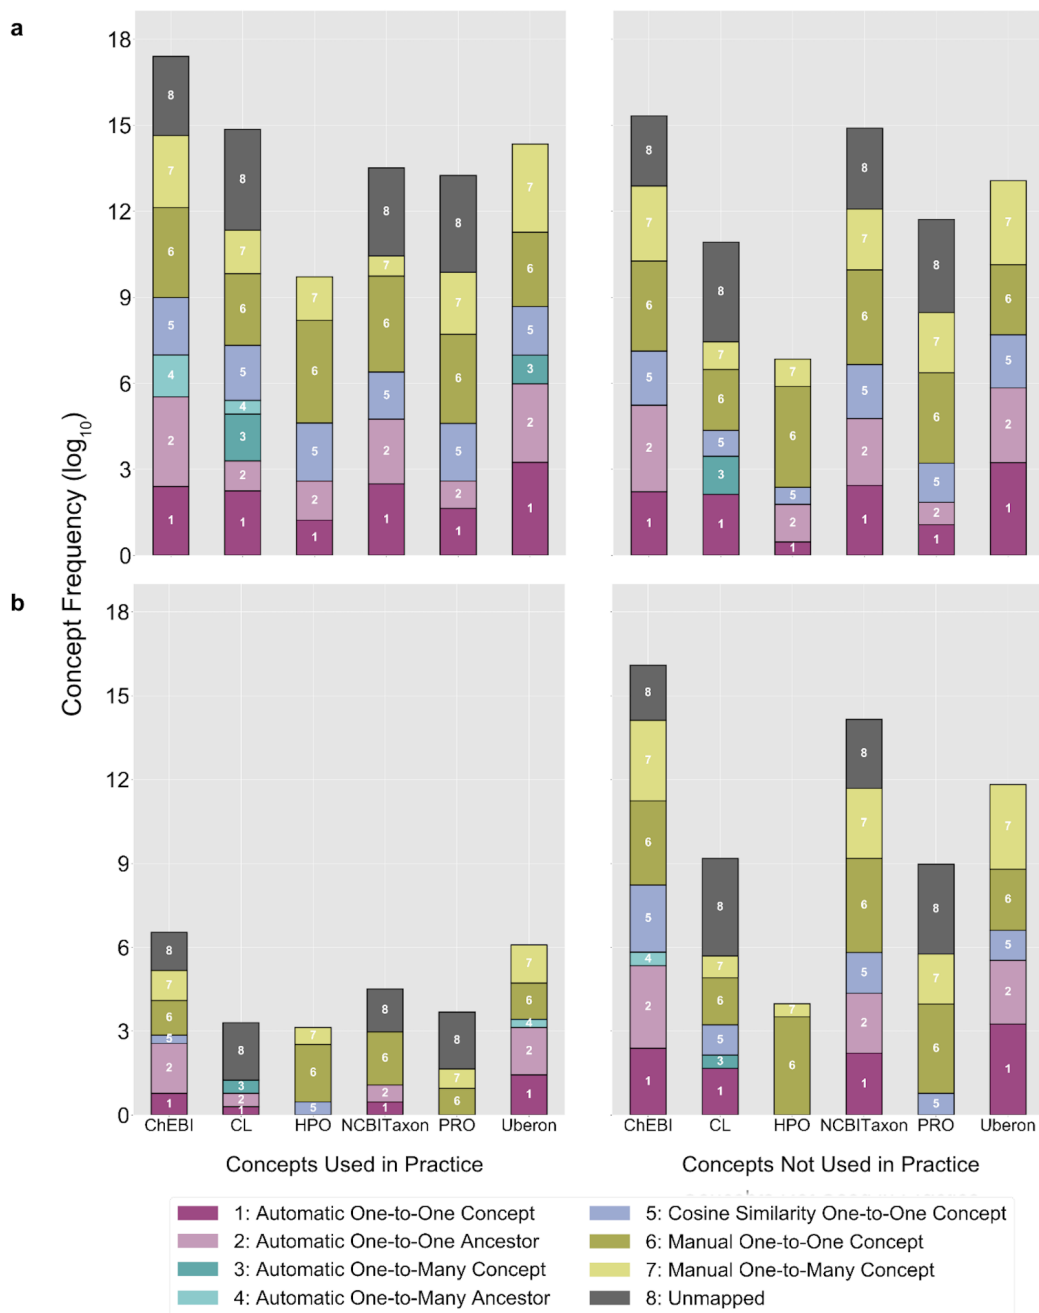

### Supplementary Figure 8: Frequency of OMOP2OBO Measurement Concepts in the OHDSI Concept Prevalence Data by OBO Foundry Ontology and Data Wave.

(A) This figure visualizes the count of Observational Medical Outcomes Partnership (OMOP) measurement concepts (log 10 scale) in the OMOP2OBO mapping set that overlapped with concepts in the Concept Prevalence Study by Open Biological and Biomedical Ontology (OBO) Foundry ontology and data wave (Concepts Used in Practice [all concepts associated with at least one patient and/or visit in the Children’s Hospital of Colorado OMOP Database] and Concepts Not Used in Practice [all concepts not used in clinical practice]). (B) This figure visualizes the count of OMOP measurement concepts (log 10 scale) in the OMOP2OBO mapping set that were not present in the Concept Prevalence Study data by OBO Foundry ontology and data wave. The labels on the bars are numbers which correspond to the OMOP2OBO mapping categories: (1) Automatic One-to-One Concept; (2) Automatic One-to-One Ancestor; (3) Automatic One-to-Many Concept; (4) Automatic One-to-Many Ancestor; (5) Cosine Similarity One-to-One Concept; (6) Manual One-to-One Concept; (7) Manual One-to-Many Concept; and (8) Unmapped.

Acronyms: ChEBI (Chemical Entities of Biological Interest); CL (Cell Ontology); HPO (Human Phenotype Ontology); NCBITaxon (National Center for Biotechnology Information Taxon Ontology); PRO (Protein Ontology); Uberon (Uber-Anatomy Ontology).

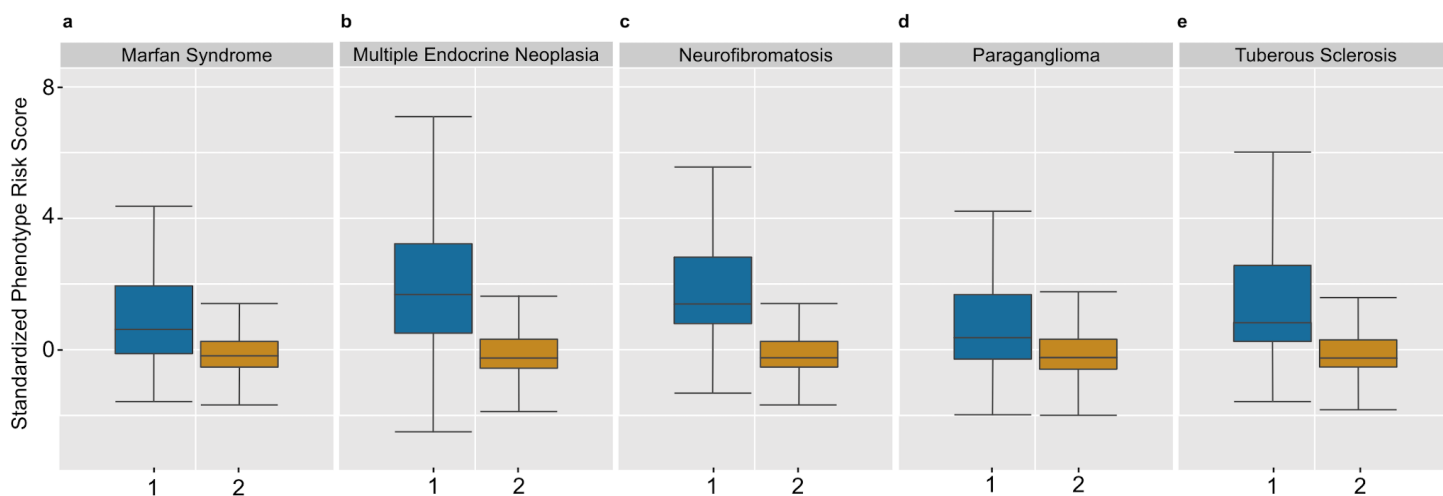

### Supplementary Figure 9: Standardized Phenotype Risk Scores (PheRS) by Disease for Cases and Controls.

The Phenotype Risk Score (PheRS) is a measure used to identify patients with phenotypic features that are clinically similar to Online Mendelian Inheritance in Man (OMIM) Mendelian profiles but who lack formal diagnosis and has demonstrated utility for identifying underdiagnosed rare disease patients using only electronic health record data. The standardized PheRS was applied to five diseases (Figures A-E) known to be caused by pathogenic genetic mutations in 11 American College of Medical Genetics and Genomics secondary finding genes (listed by disease below). In this figure, boxplots of the PheRS are used to illustrate differences between cases and controls for each of the five diseases using data from the *All of Us* Research Program. To determine if the PheRSs were significantly higher for cases than controls, one-sided Wilcoxon rank sum tests were performed for each disease. Results confirmed that cases had significantly higher PheRS than controls for all examined diseases ( $p < 0.001$  across all diseases), which included: (A) Marfan syndrome (*FBN1*, *TGFBR1*); (B) multiple endocrine neoplasia related to (*MEN1*, *RET*); (C) neurofibromatosis (*NF2*); (D) paragangliomas (related to succinate dehydrogenase genes: *SDHAF2*, *SDHB*, *SDHC*, *SDHD*); and (E) tuberous sclerosis complex (*TSC1*, *TSC2*). In each boxplot, the box extends from the first to third quartile of the data with a center line used to indicate the median. Whiskers extend from each box by 1.5x the interquartile range and outliers that extend past the whiskers shown as dots. The x-axis labels are numbers which correspond to control (blue) and case (yellow) patients.

**Supplementary Table 8: Descriptive Statistics by Disease for Cases and Controls.**

|                                       | Marfan Syndrome | Multiple Endocrine Neoplasia | Neurofibromatosis | Paraganglioma  | Tuberous Sclerosis |
|---------------------------------------|-----------------|------------------------------|-------------------|----------------|--------------------|
| <i>Cases</i>                          |                 |                              |                   |                |                    |
| Patient Count                         | 131             | 86                           | 255               | 105            | 38                 |
| <i>Standardized PheRS<sup>a</sup></i> |                 |                              |                   |                |                    |
| Mean                                  | 1.136           | 2.147                        | 1.968             | 1.072          | 1.317              |
| Median                                | 0.616           | 1.673                        | 1.381             | 0.378          | 0.824              |
| Standard Deviation                    | 2.020           | 2.375                        | 1.981             | 2.308          | 1.811              |
| Range (min, max)                      | -3.326, 11.521  | -2.512, 11.402               | -1.305, 10.767    | -1.970, 10.249 | -1.578, 6.003      |
| <i>Controls</i>                       |                 |                              |                   |                |                    |
| Patient Count                         | 63,086          | 72,150                       | 65,256            | 68,552         | 58,555             |
| <i>Standardized PheRS<sup>a</sup></i> |                 |                              |                   |                |                    |
| Mean                                  | -0.013          | -0.004                       | -0.006            | -0.002         | -0.009             |
| Median                                | -0.186          | -0.245                       | -0.234            | -0.239         | -0.264             |
| Standard Deviation                    | 0.949           | 0.996                        | 0.993             | 1.001          | 0.989              |
| Range (min, max)                      | -12.476, 7.366  | -12.305, 11.213              | -9.393, 13.595    | -9.919, 13.539 | -10.544, 23.098    |

<sup>a</sup>The standardized PheRS is derived by subtracting the normalized raw scores by the mean and dividing by the standard deviation.

Acronyms: PheRS (Phenotype Risk Score).
